# Supplementary material for: Grapevine Diversity and Genetic Relationships in Northeast Portugal Old Vineyards
Source: MDPI journal article supplement (doi:10.3390/plants10122755), 2021-12-14
Supplement: s1 [file s1]

## Article

# Grapevine Diversity and Genetic Relationships in Northeast Portugal Old Vineyards

Diana Augusto <sup>1</sup>, Javier Ibáñez <sup>2</sup>, Ana Lúcia Pinto-Sintra <sup>3</sup>, Virgílio Falco <sup>4</sup>, Fernanda Leal <sup>3</sup>, José Miguel Martínez-Zapater <sup>2</sup>, Ana Alexandra Oliveira <sup>3</sup> and Isaura Castro <sup>3,\*</sup>

**Supplementary Materials:** The following are available online at [www.mdpi.com/xxx/s1](http://www.mdpi.com/xxx/s1), **Table S1.** List of *Vitis vinifera* L. cultivars (52) and new genotypes (13) identified and corresponding accession codes; **Table S2.** List of 31 grape samples with local names and SSR and SNP identifications according to the legal cultivar name in Portugal; **Table S3.** List of the 65 grape genotypes detected at 6 nSSR and 3 cpSSR loci analysed; **Table S4.** List of the 65 non-redundant grape genotypes detected at 46 polymorphic SNP loci; **Table S5.** Genetic parameters, and allele sizes and frequencies over 6 microsatellite loci in the 65 non-redundant genotypes analysed in this study; **Table S6.** Structure results at  $K = 2$  based on 226 SNP markers. Genotypes with membership coefficients ( $q$  - values) below the threshold of 0.7 for genetic group assignment were admixed; **Figure S1.** Delta K plots obtained from STRUCTURE HARVESTER to set the most likely number of genetic groups within the 65 non-redundant grape population identified in the present study, based on 226 SNP data.

**Table S1.** List of *Vitis vinifera* L. cultivars (52) and new genotypes (13) identified and corresponding samples.

| Cultivar prime name | Samples <sup>1</sup>                                                                                                                                    |
|---------------------|---------------------------------------------------------------------------------------------------------------------------------------------------------|
| Afus Ali            | QC7.59                                                                                                                                                  |
| Alfrocheiro         | J38Ed                                                                                                                                                   |
| Alvarelhão Ceitão   | QSI19                                                                                                                                                   |
| Baga                | Qs9                                                                                                                                                     |
| Barca               | QC4.21, M66Ed                                                                                                                                           |
| Black Monukka       | QSI8, Vs17                                                                                                                                              |
| Camarate Tinto      | V1, V28, Qs21, QC4.51, QC5.37, QC7.43, QC8.33, QC9.41, QC10.10, J68Ed                                                                                   |
| Carrega Branco      | Ag10, Ag13, Sd6, Sd7, Sd14, Sd21, Sd23, Sd31, Sd32, Sd33, Sd56                                                                                          |
| Carrega Tinto       | R59Ed                                                                                                                                                   |
| Casculho            | Sd2, Sd3, Sd4, Sd9, Sd13, Sd24, Sd30, Sd35, Sd43, Sd46, Sd49, Sd52, Sd53, Qs14, QC4.28, QC4.47, QC6.69, QC7.20, QC7.41, QC8.06, QC8.31, QC8.39, QC10.58 |
| Castelão            | V33, QC9.27                                                                                                                                             |
| Chasselas           | Vs20, QSI2                                                                                                                                              |
| Cidadelhe           | Qs4                                                                                                                                                     |
| Cornifesto          | Sd20, QC8.07, J75Ed                                                                                                                                     |
| Dodrelyabi          | QSI5, QSI7, QSI11, QSI22                                                                                                                                |
| Donzelinho Roxo     | Vs21, Vs22                                                                                                                                              |
| Folha de Figueira   | Ag6, V10                                                                                                                                                |
| Gouveio             | Ag2, Ag12, Sd47, Sd63                                                                                                                                   |
| Grand Noir          | Qs18                                                                                                                                                    |
| Grec Rouge          | J17Ed                                                                                                                                                   |
| Hebén               | QSI3, QSI10                                                                                                                                             |
| Jeronimo            | Vs23                                                                                                                                                    |
| Malandra            | M61Ed, M89, M90, J61Ed, J37Ed                                                                                                                           |
| Malvasia Fina       | QC4.33                                                                                                                                                  |
| Malvasia Preta      | QC4.40, QC5.14, QC5.41, QC6.04, QC6.05, QC6.25, QC7.33, QC8.37, QC8.52, QC8.62, QC9.53                                                                  |
| Marufo              | Ag11, Vs12, Vs14, Vs15, Vs19, QSI16, Sd58, V20, V32, Qs13, QC4.13, QC6.12, QC8.01                                                                       |
| Molar               | Ag1                                                                                                                                                     |
| Montua              | Vs2, Vs4                                                                                                                                                |
| Mouratón            | Ag7, Vs5, Vs7, Vs10, Sd15, Sd17, Sd18, Sd28, Sd36, Sd38, Sd39, Sd41, Sd42, Sd48, Sd54, Sd55, Qs10                                                       |
| Mourisco de Semente | QC5.36, QC5.38, QC5.42, QC6.37, QC6.38, QC7.34, QC8.35                                                                                                  |
| Nevoeira            | QC4.17, QC4.53, QC5.07, QC6.36, QC6.49, QC9.28                                                                                                          |
| Palomino Fino       | QSI1, QSI12, QSI13, QSI15, QSI24, QSI28                                                                                                                 |
| Parraleta           | QC6.50                                                                                                                                                  |
| Perlette            | Sd25, Sd27                                                                                                                                              |

**Table S1.** (cont.)

| <b>Cultivar prime name</b> | <b>Accession Code<sup>1</sup></b>                                                                                                                                         |
|----------------------------|---------------------------------------------------------------------------------------------------------------------------------------------------------------------------|
| <b>Roseira</b>             | Qs1, Qs2, Qs5, Qs8, Qs11, Qs20, QC6.45, QC6.28, QC6.56, QC8.09, QC8.14, QC8.40, QC8.41, QC8.53, QC8.54, QC9.56                                                            |
| <b>Rufete</b>              | Qs19                                                                                                                                                                      |
| <b>Samarrinho</b>          | Vs9                                                                                                                                                                       |
| <b>Síria</b>               | Vs11, Vs18, QSI6, QSI18, QSI20, QSI23, QSI29, QSI33, QSI34, Sd5, Sd10, Sd19, Sd22, Sd29, Sd34, Sd37, Sd61                                                                 |
| <b>Tamarez</b>             | R93                                                                                                                                                                       |
| <b>Tempranillo</b>         | Vs24, Sd44, Sd45, V4, V6, V8, V9, V14, V15, V17, V39, QC5.11, QC6.67                                                                                                      |
| <b>Tinta Aguiar</b>        | V44, C22Ed                                                                                                                                                                |
| <b>Tinta Barroca</b>       | Sd57, QC5.21                                                                                                                                                              |
| <b>Tinta Carvalha</b>      | Vs3, Vs8, V34, V47, QC6.29, QC8.15, M5.3                                                                                                                                  |
| <b>Tinta Francisca</b>     | V12, V19, V29, V50, Qs15, QC4.50, QC10.56                                                                                                                                 |
| <b>Tinta Mesquita</b>      | C24Ed                                                                                                                                                                     |
| <b>Tinto Cão</b>           | Vs16, Sd50, QC9.01, QC10.68                                                                                                                                               |
| <b>Touriga Fêmea</b>       | QC4.38, QC4.45, QC4.55, QC5.19                                                                                                                                            |
| <b>Touriga Franca</b>      | Sd12, QC4.30, QC5.46, QC7.09, QC9.45, QC9.57, M5.1                                                                                                                        |
| <b>Touriga Nacional</b>    | V7, V23, Qs6, QC4.64, QC9.13, QC9.42                                                                                                                                      |
| <b>Trincadeira</b>         | Vs13, Vs27, QSI4, QSI17, QSI21, QSI25, QSI26, QSI27, QSI30, QSI31, QSI35, Sd8, Sd11, Sd51, Sd62, V5, V13, V22, V27, V30, V38, V40, V46, QC8.50, QC9.08, J36Ed, J40Ed, J92 |
| <b>Trousseau Noir</b>      | Vs25, Vs26, QSI9, QSI14, QSI32, Sd1, Sd16, Sd59, Sd60, Qs7                                                                                                                |
| <b>Vinhão</b>              | Qs12, QC4.62, QC8.65                                                                                                                                                      |
| <b>New genotypes</b>       | <b>Accession Code<sup>1</sup></b>                                                                                                                                         |
| <b>NG001</b>               | Ag3, Ag5, Vs6                                                                                                                                                             |
| <b>NG002</b>               | Ag8                                                                                                                                                                       |
| <b>NG003</b>               | Ag9                                                                                                                                                                       |
| <b>NG004</b>               | Ag14                                                                                                                                                                      |
| <b>NG005</b>               | Sd40                                                                                                                                                                      |
| <b>NG006</b>               | QC4.20                                                                                                                                                                    |
| <b>NG007</b>               | QC4.25, QC6.09, QC6.11, QC7.23                                                                                                                                            |
| <b>NG008</b>               | QC5.17, QC7.05, QC7.06, QC8.25                                                                                                                                            |
| <b>NG009</b>               | QC5.35, QC6.66, QC8.29, QC8.47                                                                                                                                            |
| <b>NG010</b>               | QC10.42                                                                                                                                                                   |
| <b>NG011</b>               | Qs17                                                                                                                                                                      |
| <b>NG012</b>               | C25Ed                                                                                                                                                                     |
| <b>NG013</b>               | J18Ed, J39Ed, J42Ed, J43Ed, J44Ed, J84Ed, J91                                                                                                                             |

<sup>1</sup> Ag - Agueiras; C - Quinta do Cruzeiro; J - Quinta do Junco; M - Quinta dos Muros; QC - Quinta das Carvalhas; Qs - Quinta do Seixo; QSI - Quinta de Santa Isabel; Sd - Sendim; V - Quinta dos Lagares; Vs - Vassal; R - Quinta da Roêda.

**Table S2.** List of 31 grape samples with local names and SSR and SNP identifications according to the legal cultivar name in Portugal.

| Sample code <sup>1</sup> | Local names                | Recommended MVC name or provisional name (ICVV-SNP genotype) |
|--------------------------|----------------------------|--------------------------------------------------------------|
| Ag2                      | Verdelheira / Verdelho     | Gouveio                                                      |
| Ag6                      | Loulela / Folgazona        | Folha de Figueira                                            |
| Ag7                      | Mourisco                   | Mouratón                                                     |
| Ag8                      | Lázaro / Raposeira         | Lázaro (NG002; GEN_DNA_4343)                                 |
| Ag14                     | Rosada                     | Rosada (NG004; GEN_DNA_4347)                                 |
| Vs13                     | Tinta Amarela Antiga       | Trincadeira                                                  |
| Vs27                     | Tinta Amarela Antiga       | Trincadeira                                                  |
| Sd2                      | Tinta Grossa               | Casculho                                                     |
| Sd5                      | Polita                     | Síria                                                        |
| Sd12                     | Tinta Garcia / João Garcia | Touriga Franca                                               |
| Qs1                      | Roseira                    | Roseira                                                      |
| Qs2                      | Mourisco de Semente        | Roseira                                                      |
| Qs4                      | Preto Martinho             | Cidadelhe                                                    |
| Qs5                      | Mesquita                   | Roseira                                                      |
| Qs6                      | Touriga Fêmea              | Touriga Nacional                                             |
| Qs7                      | Bastardo                   | Trousseau Noir                                               |
| Qs8                      | Tinta Carvalha             | Roseira                                                      |
| Qs9                      | Tinta Bairrada             | Baga                                                         |
| Qs10                     | Bastardinho                | Mouratón                                                     |
| Qs11                     | Intorzeira                 | Roseira                                                      |
| Qs12                     | Sousão                     | Vinhão                                                       |
| Qs13                     | Barca                      | Marufo                                                       |
| Qs14                     | Casculho                   | Casculho                                                     |
| Qs15                     | Tinta Francisca            | Tinta Francisca                                              |
| Qs17                     | Mourisco                   | Mourisco Falso (NG011; GEN_DNA_4349)                         |
| Qs18                     | Grand Noir                 | Grand Noir                                                   |
| Qs19                     | Rufete                     | Rufete                                                       |
| Qs20                     | Cornifesto                 | Roseira                                                      |
| Qs21                     | Moreto                     | Camarate Tinto                                               |
| J17Ed                    | Rabigato Francês           | Grec Rouge                                                   |
| C24Ed                    | Tinta do Bragão            | Tinta Mesquita                                               |
| C25Ed                    | Mourisco de Semente        | Mourisco de Semente Falso (NG012; GEN_DNA_4350)              |
| M5.1                     | Tinta Malandra             | Touriga Franca                                               |

<sup>1</sup> Ag - Agueiras; C - Quinta do Cruzeiro; J - Quinta do Junco; M - Quinta dos Muros; Qs - Quinta do Seixo; Sd - Sendim; Vs - Vassal.

**Table S3.** List of the 65 grape genotypes detected at 6 nSSR and chlorotypes obtained from 3 cpSSR loci analysed.

| Genotype            | nSSR sizes (bp) <sup>1</sup> |            |       |     |       |            |        |     |         |     |            |     | Chloro-<br>types <sup>2</sup> | References |
|---------------------|------------------------------|------------|-------|-----|-------|------------|--------|-----|---------|-----|------------|-----|-------------------------------|------------|
|                     | VVS2                         |            | VVMD5 |     | VVMD7 |            | VVMD27 |     | VrZAG62 |     | VrZAG79    |     |                               |            |
| Afus Ali            | 132                          | 134        | 222   | 228 | 239   | 249        | 181    | 181 | 189     | 191 | 241        | 249 | A                             | [1]        |
| Alfrocheiro         | 142                          | 150        | 222   | 234 | 253   | 257        | 175    | 185 | 191     | 203 | 249        | 249 | A                             | [2]        |
| Alvarelhão Ceitão   | 142                          | 150        | 222   | 236 | 239   | 243        | 185    | 191 | 191     | 191 | 249        | 255 | A                             | [3]        |
| Baga                | 142                          | <b>154</b> | 228   | 236 | 239   | 239        | 175    | 185 | 191     | 207 | 245        | 249 | A                             | [4]        |
| Barca               | 142                          | 150        | 222   | 228 | 239   | 239        | 179    | 185 | 191     | 191 | 243        | 255 | D                             | [4]        |
| Black Monukka       | 140                          | 150        | 230   | 236 | 253   | 253        | 177    | 191 | 191     | 191 | 245        | 255 | C                             | [1]        |
| Camarate Tinto      | 144                          | 150        | 232   | 234 | 243   | 253        | 177    | 185 | 191     | 203 | 245        | 249 | A                             | [2]        |
| Carrega Branco      | 136                          | 150        | 232   | 234 | 243   | 257        | 177    | 185 | 191     | 197 | 243        | 245 | D                             | this study |
| Carrega Tinto       | 142                          | 150        | 230   | 234 | 239   | 253        | 175    | 191 | 191     | 203 | 249        | 255 | A                             | [1,2]      |
| Casculho            | 144                          | 150        | 232   | 234 | 249   | 253        | 177    | 185 | 203     | 207 | 245        | 249 | A                             | [5]        |
| Castelão            | 142                          | 144        | 232   | 234 | 243   | 257        | 175    | 177 | 191     | 191 | 245        | 249 | A                             | [2]        |
| Chasselas           | 132                          | 142        | 224   | 232 | 239   | 247        | 181    | 185 | 197     | 207 | 249        | 257 | D                             | [4]        |
| Cidadelhe           | 142                          | 142        | 228   | 230 | 243   | 253        | 177    | 191 | 195     | 203 | 245        | 255 | D                             | [1]        |
| Cornifesto          | 142                          | 144        | 230   | 234 | 249   | 253        | 177    | 185 | 203     | 207 | 245        | 249 | A                             | [2]        |
| Dodrelyabi          | 132                          | 134        | 222   | 232 | 247   | <b>255</b> | 175    | 181 | 207     | 207 | 249        | 249 | B                             | [1]        |
| Donzelinho Roxo     | 142                          | 150        | 224   | 234 | 239   | 243        | 185    | 191 | 189     | 195 | 249        | 255 | D                             | [5]        |
| Folha de Figueira   | 142                          | 156        | 232   | 236 | 239   | 239        | 175    | 181 | 189     | 189 | 249        | 249 | A                             | [1]        |
| Gouveio             | 150                          | 156        | 222   | 234 | 239   | 243        | 181    | 185 | 189     | 191 | 249        | 249 | A                             | [2,4]      |
| Grand Noir          | <b>138</b>                   | 150        | 222   | 230 | 239   | 243        | 177    | 179 | 191     | 191 | 241        | 257 | A                             | [1]        |
| Grec Rouge          | 132                          | 142        | 224   | 232 | 247   | 253        | 181    | 181 | 191     | 197 | <b>237</b> | 249 | A                             | [1]        |
| Hebén               | 142                          | 144        | 230   | 236 | 239   | 243        | 177    | 191 | 191     | 191 | 245        | 255 | A                             | [1]        |
| Jeronimo            | 134                          | 142        | 230   | 234 | 243   | 243        | 191    | 191 | 191     | 191 | 255        | 255 | A                             | [1]        |
| Malandra            | 142                          | 150        | 222   | 236 | 239   | 253        | 175    | 177 | 191     | 203 | 249        | 259 | D                             | [1]        |
| Malvasia Fina       | 142                          | 144        | 222   | 236 | 239   | 257        | 175    | 191 | 191     | 191 | 245        | 249 | A                             | [2,4]      |
| Malvasia Preta      | 136                          | 150        | 222   | 232 | 249   | 253        | 177    | 185 | 203     | 207 | 245        | 249 | A                             | [1]        |
| Marufo              | 142                          | 144        | 224   | 228 | 239   | 243        | 179    | 191 | 191     | 195 | 245        | 255 | D                             | [2,4]      |
| Molar               | 132                          | 150        | 222   | 234 | 239   | 257        | 177    | 185 | 191     | 197 | 243        | 259 | A                             | [1]        |
| Montua              | 142                          | 150        | 230   | 234 | 243   | 253        | 177    | 181 | 191     | 191 | 245        | 255 | A                             | [2,3]      |
| Mouratón            | 136                          | 150        | 230   | 234 | 249   | 257        | 177    | 185 | 191     | 207 | 245        | 249 | A                             | [1]        |
| Mourisco de Semente | 134                          | 142        | 228   | 234 | 239   | 239        | 177    | 191 | 191     | 197 | 245        | 255 | D                             | [1]        |
| Nevoeira            | 150                          | 156        | 228   | 232 | 239   | 257        | 175    | 185 | 189     | 197 | 245        | 245 | A                             | this study |
| Palomino Fino       | 132                          | 144        | 224   | 236 | 239   | 249        | 181    | 191 | 191     | 197 | 249        | 255 | D                             | [2]        |

Table S3. (cont.)

| Genotype         | nSSR sizes (bp) <sup>1</sup> |     |       |     |            |     |        |     |         |            |            |            | Chloro-<br>types <sup>2</sup> | References |
|------------------|------------------------------|-----|-------|-----|------------|-----|--------|-----|---------|------------|------------|------------|-------------------------------|------------|
|                  | VVS2                         |     | VVMD5 |     | VVMD7      |     | VVMD27 |     | VrZAG62 |            | VrZAG79    |            |                               |            |
| Parraleta        | 132                          | 132 | 218   | 234 | 239        | 239 | 175    | 185 | 189     | 191        | 249        | 259        | A                             | [2]        |
| Perlette         | 132                          | 144 | 230   | 232 | 247        | 253 | 175    | 177 | 191     | 207        | 245        | <u>253</u> | A                             | [1]        |
| Roseira          | 142                          | 142 | 222   | 228 | 239        | 253 | 177    | 191 | 191     | 203        | 245        | 245        | D                             | this study |
| Rufete           | 132                          | 156 | 222   | 232 | 239        | 257 | 177    | 185 | 191     | 197        | 243        | 245        | A                             | [2]        |
| Samarrinho       | 132                          | 150 | 228   | 228 | 239        | 257 | 175    | 185 | 189     | 197        | 243        | 249        | D                             | [2]        |
| Síria            | 136                          | 150 | 218   | 230 | 239        | 249 | 177    | 177 | 189     | 207        | 245        | 245        | A                             | [2]        |
| Tamarez          | 144                          | 150 | 222   | 232 | 239        | 243 | 175    | 177 | 191     | 197        | 245        | 249        | D                             | [2]        |
| Tempranillo      | 142                          | 144 | 232   | 232 | 239        | 253 | 179    | 179 | 199     | 203        | 245        | 249        | A                             | [2,4]      |
| Tinta Aguiar     | 142                          | 144 | 222   | 228 | 239        | 243 | 185    | 191 | 195     | 197        | 243        | 255        | D                             | [1]        |
| Tinta Barroca    | 142                          | 150 | 224   | 232 | 239        | 243 | 177    | 179 | 191     | 195        | 243        | 245        | D                             | [4,6]      |
| Tinta Carvalha   | 144                          | 150 | 228   | 232 | 249        | 263 | 177    | 185 | 197     | 207        | 245        | 249        | D                             | [4]        |
| Tinta Francisca  | 132                          | 132 | 234   | 236 | 239        | 239 | 181    | 185 | 189     | 201        | 241        | 245        | A                             | [4]        |
| Tinta Mesquita   | 132                          | 144 | 222   | 228 | 239        | 263 | 185    | 191 | 191     | 199        | 243        | 255        | D                             | [1]        |
| Tinto Cão        | 132                          | 132 | 228   | 230 | 239        | 263 | 177    | 181 | 189     | 197        | 245        | 249        | A                             | [4,6]      |
| Touriga Fêmea    | 142                          | 142 | 232   | 236 | 239        | 257 | 175    | 185 | 191     | 197        | 243        | 249        | A                             | [1]        |
| Touriga Franca   | 142                          | 150 | 222   | 224 | 239        | 243 | 177    | 179 | 195     | 197        | 243        | 245        | D                             | [2,4,6]    |
| Touriga Nacional | 142                          | 152 | 222   | 232 | 239        | 239 | 177    | 185 | 191     | 197        | 243        | 243        | A                             | [4]        |
| Trincadeira      | 132                          | 150 | 230   | 234 | 239        | 249 | 177    | 181 | 191     | 207        | 245        | 249        | D                             | [2,4]      |
| Trousseau Noir   | 142                          | 150 | 234   | 234 | 239        | 257 | 171    | 185 | 191     | 191        | 243        | 245        | A                             | [2,7]      |
| Vinhão           | 132                          | 134 | 218   | 222 | 239        | 263 | 185    | 185 | 191     | 199        | 243        | 249        | A                             | [4]        |
| NG001            | 136                          | 150 | 230   | 234 | 241        | 243 | 177    | 185 | 189     | 191        | 245        | 249        | D                             | this study |
| NG002            | 136                          | 158 | 222   | 232 | 239        | 239 | 177    | 185 | 189     | 189        | 245        | 249        | D                             | this study |
| NG003            | 144                          | 152 | 224   | 234 | 239        | 239 | 185    | 185 | 191     | 191        | 243        | 255        | D                             | this study |
| NG004            | 142                          | 158 | 222   | 224 | 241        | 243 | 179    | 185 | 191     | 195        | 245        | 249        | D                             | this study |
| NG005            | 132                          | 150 | 232   | 234 | 239        | 239 | 177    | 185 | 189     | 191        | 245        | 249        | D                             | this study |
| NG006            | 132                          | 144 | 224   | 230 | 239        | 263 | 177    | 191 | 191     | 197        | 245        | 255        | D                             | this study |
| NG007            | 144                          | 144 | 228   | 232 | 243        | 253 | 185    | 191 | 199     | 203        | 249        | 255        | D                             | this study |
| NG008            | 142                          | 144 | 224   | 232 | 239        | 239 | 181    | 181 | 189     | 191        | 245        | 249        | D                             | this study |
| NG009            | 132                          | 142 | 224   | 230 | 239        | 243 | 177    | 191 | 191     | 195        | 245        | 255        | D                             | this study |
| NG010            | 142                          | 150 | 222   | 232 | 239        | 239 | 177    | 185 | 191     | 197        | 241        | 249        | D                             | this study |
| NG011            | 132                          | 144 | 224   | 236 | 243        | 249 | 181    | 191 | 195     | <u>205</u> | 249        | 255        | D                             | this study |
| NG012            | 132                          | 144 | 224   | 230 | <u>237</u> | 239 | 177    | 185 | 191     | 201        | 249        | 255        | D                             | this study |
| NG013            | 132                          | 140 | 226   | 228 | 239        | 243 | 171    | 175 | 191     | 195        | <u>247</u> | 249        | A                             | this study |

<sup>1</sup> Specific SSR alleles (those which occurred in no more than one genotype) are bold underlined.<sup>2</sup> Designation according to Arroyo-García *et al.* [8].

**Table S4.** List of the 65 non-redundant grape genotypes detected at 46 polymorphic SNP loci. Chlorotypes were determined using the combination of SNP\_NG\_C\_001, SNP\_NG\_C\_003 and SNP\_NG\_D\_003 loci (CCG correspond to chl A, CTG to chl B, TTG to chl C and CCA to D).

| Genotype            | SNP1003_336 | SNP1015_67 | SNP1027_69 | SNP1035_226 | SNP1079_58 | SNP1127_70 | SNP1157_64 | SNP1215_138 | SNP1229_219 | SNP1323_155 | SNP1349_174 | SNP1399_81 | SNP1411_565 | SNP1445_218 | SNP1453_40 |
|---------------------|-------------|------------|------------|-------------|------------|------------|------------|-------------|-------------|-------------|-------------|------------|-------------|-------------|------------|
| Afus Ali            | AA          | GG         | CC         | CT          | AG         | GG         | TT         | TT          | CC          | CC          | AG          | AA         | TT          | AG          | AG         |
| Alfrocheiro         | AC          | GG         | CT         | CT          | AG         | GT         | AT         | TT          | CG          | AA          | AG          | AA         | AT          | AG          | AG         |
| Alvarelhão Ceitão   | AC          | AG         | CT         | TT          | AG         | GG         | TT         | CT          | CG          | AC          | GG          | AA         | TT          | AG          | GG         |
| Baga                | CC          | AG         | TT         | CT          | GG         | GT         | AT         | CT          | CG          | CC          | GG          | AG         | TT          | AG          | AG         |
| Barca               | AC          | GG         | CC         | CC          | GG         | GT         | AT         | TT          | GG          | CC          | GG          | AA         | AT          | AA          | AG         |
| Black Monukka       | AC          | AG         | CT         | CT          | AG         | GT         | AT         | TT          | CG          | AC          | GG          | AA         | TT          | AG          | AG         |
| Camarate Tinto      | AC          | AG         | CT         | TT          | AG         | GG         | AT         | CT          | CG          | AC          | AA          | AA         | TT          | AA          | AG         |
| Carrega Branco      | CC          | AG         | CC         | CC          | AG         | GT         | TT         | CT          | CC          | CC          | GG          | AA         | TT          | AG          | AG         |
| Carrega Tinto       | CC          | AG         | TT         | TT          | AG         | GT         | AT         | CT          | CG          | AC          | AG          | AA         | TT          | GG          | AG         |
| Casculho            | AC          | AG         | CC         | CT          | AA         | GG         | TT         | CT          | CG          | AC          | AA          | AA         | AT          | AG          | GG         |
| Castelão            | CC          | AG         | CT         | CC          | AA         | GT         | TT         | CT          | CG          | AC          | AA          | AA         | TT          | AA          | GG         |
| Chasselas           | AA          | GG         | CT         | CT          | AG         | TT         | TT         | CT          | CC          | AC          | AG          | AA         | TT          | AG          | AA         |
| Cidadelhe           | AC          | GG         | CC         | CC          | AG         | GT         | TT         | CC          | GG          | AC          | GG          | AA         | TT          | AA          | AA         |
| Cornifesto          | CC          | AG         | CT         | TT          | AA         | GT         | TT         | CT          | CG          | AC          | AG          | AA         | TT          | AG          | AG         |
| Dodrelyabi          | AC          | GG         | CT         | TT          | AG         | GG         | TT         | TT          | CG          | CC          | AA          | AA         | TT          | AG          | AA         |
| Donzelinho Roxo     | --          | AG         | CC         | CC          | AG         | GT         | TT         | CT          | CG          | AC          | AA          | AA         | AT          | AA          | AG         |
| Folha de Figueira   | AC          | GG         | TT         | CT          | AG         | GG         | TT         | CT          | CC          | CC          | AG          | AA         | AT          | AG          | AA         |
| Gouveio             | CC          | AG         | CC         | CT          | GG         | GT         | TT         | CT          | CC          | AC          | AG          | AA         | AT          | AA          | AG         |
| Grand Noir          | CC          | AG         | CC         | CC          | GG         | GT         | AT         | TT          | CG          | AC          | GG          | AA         | AA          | AG          | AA         |
| Grec Rouge          | CC          | AG         | CT         | CT          | GG         | TT         | TT         | TT          | CG          | AC          | AA          | AA         | AT          | AG          | GG         |
| Hebén               | CC          | AG         | TT         | CT          | AG         | GG         | TT         | CC          | CC          | CC          | GG          | AA         | TT          | GG          | AG         |
| Jeronimo            | CC          | GG         | CT         | CT          | AG         | GG         | TT         | CT          | CC          | CC          | AG          | AA         | TT          | GG          | AA         |
| Malandra            | CC          | GG         | CT         | TT          | GG         | GT         | TT         | CT          | CG          | AC          | GG          | AA         | TT          | AG          | AG         |
| Malvasia Fina       | CC          | GG         | TT         | CT          | AG         | GG         | AT         | CT          | CC          | AC          | GG          | AA         | TT          | AG          | AG         |
| Malvasia Preta      | AC          | AG         | CT         | CT          | AA         | GT         | AT         | CT          | CG          | AC          | AA          | AA         | TT          | GG          | AG         |
| Marufo              | CC          | AG         | CT         | CT          | AG         | GG         | TT         | CT          | GG          | CC          | AG          | AA         | AT          | AA          | AG         |
| Molar               | AC          | AG         | CT         | CT          | GG         | GT         | AT         | TT          | CG          | AA          | AG          | AA         | AT          | AG          | AG         |
| Montua              | AC          | AG         | CT         | CT          | AG         | GG         | TT         | CC          | CC          | CC          | AG          | AA         | TT          | GG          | AA         |
| Mouratón            | CC          | AG         | CC         | CT          | AG         | GT         | AT         | CT          | CG          | AC          | AG          | AA         | TT          | AG          | AG         |
| Mourisco de Semente | AC          | AG         | CT         | TT          | GG         | GT         | AT         | CC          | CG          | AC          | GG          | AA         | AT          | AG          | AG         |
| Nevoeira            | AC          | GG         | CT         | CT          | AG         | GT         | TT         | CC          | CG          | CC          | AA          | AA         | TT          | AA          | AA         |
| Palomino Fino       | AC          | GG         | TT         | TT          | AG         | GG         | TT         | CT          | CC          | CC          | AG          | AA         | AT          | GG          | AG         |
| Parraleta           | AC          | GG         | CT         | TT          | GG         | GG         | TT         | CT          | CG          | AA          | AG          | AA         | AT          | AA          | AA         |
| Perlette            | AA          | GG         | CC         | CC          | AG         | GG         | AT         | CC          | CC          | AC          | AG          | AA         | AT          | GG          | AG         |

**Table S4.** (cont.)

| Genotype         | SNP1003_336 | SNP1015_67 | SNP1027_69 | SNP1035_226 | SNP1079_58 | SNP1127_70 | SNP1157_64 | SNP1215_138 | SNP1229_219 | SNP1323_155 | SNP1349_174 | SNP1399_81 | SNP1411_565 | SNP1445_218 | SNP1453_40 |
|------------------|-------------|------------|------------|-------------|------------|------------|------------|-------------|-------------|-------------|-------------|------------|-------------|-------------|------------|
| Roseira          | CC          | AG         | CT         | CT          | GG         | GG         | TT         | CT          | GG          | CC          | GG          | AA         | TT          | AG          | AG         |
| Rufete           | AC          | AG         | CC         | TT          | AG         | TT         | TT         | CT          | CG          | AA          | AG          | AA         | TT          | AG          | AA         |
| Samarrinho       | AC          | GG         | CT         | CT          | AG         | GT         | AT         | CT          | CC          | AC          | AG          | AG         | TT          | AG          | AA         |
| Síria            | CC          | AG         | CC         | TT          | AG         | GG         | TT         | CT          | CC          | CC          | AG          | AA         | TT          | AA          | AG         |
| Tamarez          | CC          | AG         | TT         | TT          | AA         | GG         | TT         | CT          | CC          | AA          | AG          | AA         | TT          | AG          | AG         |
| Tempranillo      | CC          | GG         | CC         | CT          | AG         | GG         | TT         | CC          | CC          | AC          | AA          | AA         | AT          | GG          | GG         |
| Tinta Aguiar     | CC          | GG         | CT         | CC          | GG         | GT         | TT         | TT          | GG          | CC          | GG          | AA         | AA          | AA          | AG         |
| Tinta Barroca    | CC          | AG         | CT         | CC          | AG         | GT         | TT         | TT          | GG          | CC          | AG          | AA         | AT          | AA          | AG         |
| Tinta Carvalha   | CC          | AG         | CC         | CT          | AA         | GT         | TT         | CT          | CG          | CC          | AA          | AA         | TT          | GG          | AG         |
| Tinta Francisca  | CC          | GG         | CC         | TT          | AA         | GT         | AT         | CT          | CG          | AC          | GG          | AA         | AT          | GG          | AA         |
| Tinta Mesquita   | CC          | AG         | CT         | TT          | GG         | GG         | TT         | CC          | GG          | AC          | AG          | AA         | AT          | AG          | AA         |
| Tinto Cão        | AC          | AG         | CT         | TT          | AG         | GG         | TT         | CC          | CG          | AC          | AG          | AG         | AT          | AG          | AA         |
| Touriga Fêmea    | CC          | GG         | CT         | CC          | GG         | GT         | TT         | TT          | CG          | CC          | AG          | AA         | TT          | AG          | AG         |
| Touriga Franca   | AC          | AG         | CC         | CC          | GG         | GT         | TT         | CT          | GG          | CC          | AG          | AA         | AT          | AA          | AA         |
| Touriga Nacional | AC          | GG         | CC         | CT          | GG         | TT         | AT         | TT          | CG          | CC          | AG          | AA         | AT          | AG          | AA         |
| Trincadeira      | CC          | AG         | CT         | TT          | AA         | GG         | TT         | CC          | CG          | AC          | AG          | AA         | TT          | AG          | AG         |
| Trousseau Noir   | AC          | GG         | CC         | CT          | GG         | GT         | AT         | CT          | CC          | CC          | AG          | AG         | TT          | AG          | AA         |
| Vinhão           | CC          | GG         | CT         | CT          | GG         | GT         | AT         | CT          | GG          | AA          | AG          | AA         | TT          | AG          | AG         |
| NG001            | AC          | AA         | CC         | CT          | AG         | GT         | TT         | CT          | CC          | CC          | AG          | AA         | TT          | GG          | GG         |
| NG002            | CC          | AG         | CC         | CC          | AG         | GT         | TT         | CT          | CC          | AC          | GG          | AA         | TT          | AA          | GG         |
| NG003            | CC          | AG         | CT         | CT          | GG         | GT         | TT         | CT          | CG          | CC          | AA          | AG         | TT          | AG          | AG         |
| NG004            | CC          | AG         | CT         | CC          | AG         | GT         | TT         | CT          | CG          | CC          | AG          | AA         | AT          | AA          | AG         |
| NG005            | AC          | AA         | CC         | TT          | AG         | GT         | TT         | CT          | CC          | CC          | AG          | AA         | TT          | AG          | AG         |
| NG006            | CC          | AA         | CT         | TT          | AG         | GG         | TT         | CT          | CG          | CC          | AG          | AA         | AT          | AA          | AA         |
| NG007            | CC          | GG         | CT         | TT          | GG         | GG         | AT         | CT          | GG          | AC          | AG          | AA         | AT          | AA          | AG         |
| NG008            | AC          | AG         | TT         | CC          | AA         | GG         | TT         | TT          | CG          | CC          | AA          | AA         | AT          | AA          | AG         |
| NG009            | CC          | GG         | CC         | TT          | AA         | GG         | TT         | CT          | GG          | AC          | AG          | AA         | AT          | AA          | AG         |
| NG010            | --          | AG         | --         | CT          | GG         | --         | TT         | CT          | GG          | CC          | --          | AA         | --          | --          | AG         |
| NG011            | CC          | AA         | CT         | TT          | AG         | GG         | TT         | CT          | CG          | CC          | AA          | AA         | AT          | AG          | AG         |
| NG012            | CC          | AG         | CT         | CT          | GG         | GG         | AT         | CT          | GG          | AC          | GG          | AA         | AT          | AG          | AG         |
| NG013            | AC          | GG         | CT         | CC          | AG         | TT         | TT         | TT          | CG          | AC          | AA          | AA         | AT          | GG          | AA         |



**Table S4.** (cont.)

| Genotype            | SNP1513_153 | SNP191_100 | SNP197_82 | SNP259_199 | SNP269_308 | SNP325_65 | SNP425_205 | SNP447_244 | SNP555_132 | SNP579_187 | SNP581_114 | SNP593_149 | SNP613_315 | SNP697_296 | SNP819_210 |
|---------------------|-------------|------------|-----------|------------|------------|-----------|------------|------------|------------|------------|------------|------------|------------|------------|------------|
| Afus Ali            | TT          | CC         | AC        | AA         | AG         | AT        | AA         | CT         | AA         | TT         | AA         | TT         | CC         | AA         | AT         |
| Alfrocheiro         | TT          | CC         | AC        | AA         | AG         | AA        | AA         | CC         | AC         | TT         | GG         | CT         | CC         | AA         | AT         |
| Alvarelhão Ceitão   | CT          | CC         | AC        | AT         | GG         | AT        | AA         | CT         | AC         | TT         | GG         | CT         | TT         | AG         | AT         |
| Baga                | CT          | CT         | AC        | AT         | AG         | AA        | AA         | CC         | AC         | CT         | GG         | TT         | CC         | AG         | TT         |
| Barca               | CT          | CT         | CC        | TT         | GG         | AA        | AA         | CT         | AA         | CT         | GG         | CT         | CC         | --         | AT         |
| Black Monukka       | TT          | CC         | AC        | AT         | AA         | AA        | AA         | CT         | AC         | TT         | AG         | TT         | CT         | AA         | TT         |
| Camarate Tinto      | TT          | CC         | CC        | AA         | AG         | AA        | AA         | CC         | AC         | CT         | GG         | TT         | CC         | AG         | AT         |
| Carrega Branco      | CT          | CC         | CC        | TT         | GG         | AA        | AA         | CT         | AA         | CT         | AG         | TT         | TT         | AG         | AT         |
| Carrega Tinto       | TT          | CC         | CC        | AT         | GG         | AT        | AA         | CC         | AC         | CT         | GG         | CT         | CC         | AA         | AA         |
| Casculho            | TT          | CC         | CC        | AT         | GG         | AA        | AA         | CC         | AC         | TT         | AG         | CT         | CT         | AG         | AT         |
| Castelão            | TT          | CC         | AC        | AT         | GG         | AA        | AA         | CC         | AA         | CT         | GG         | CT         | CT         | AG         | AA         |
| Chasselas           | CC          | CT         | CC        | AT         | AA         | AT        | AA         | CC         | AC         | TT         | AG         | CC         | CT         | AA         | AT         |
| Cidadelhe           | TT          | CC         | CC        | AT         | AA         | AA        | AA         | CC         | AA         | CT         | GG         | CC         | CT         | GG         | AA         |
| Cornifesto          | TT          | CC         | CC        | AT         | AG         | AA        | AA         | CC         | AA         | CT         | AG         | CT         | CC         | AG         | AA         |
| Dodrelyabi          | TT          | CC         | CC        | TT         | AG         | TT        | AA         | CT         | AC         | TT         | AG         | CT         | CC         | AA         | TT         |
| Donzelinho Roxo     | TT          | CC         | CC        | AT         | AA         | AA        | AA         | CT         | AA         | CC         | GG         | CT         | CT         | AG         | AA         |
| Folha de Figueira   | CC          | CC         | AC        | AA         | GG         | AT        | AA         | CT         | AC         | CT         | AG         | CT         | CC         | AA         | AT         |
| Gouveio             | CT          | CC         | AC        | AA         | AG         | AA        | AA         | CT         | AA         | CT         | GG         | TT         | CC         | AA         | AT         |
| Grand Noir          | CC          | CC         | AC        | TT         | AG         | AT        | AA         | CT         | AA         | TT         | AG         | TT         | CT         | AA         | AA         |
| Grec Rouge          | CT          | CC         | CC        | AT         | AG         | AT        | AC         | CT         | AC         | CT         | AG         | CC         | CT         | AA         | AT         |
| Hebén               | TT          | CC         | CC        | TT         | GG         | AT        | AA         | CC         | AA         | CT         | GG         | CT         | CT         | AG         | AT         |
| Jeronimo            | TT          | CC         | CC        | AT         | AG         | AT        | AA         | CT         | AA         | TT         | AG         | TT         | CT         | AG         | TT         |
| Malandra            | CT          | CC         | AA        | AT         | AG         | TT        | AA         | CC         | AC         | TT         | AG         | TT         | CC         | AA         | TT         |
| Malvasia Fina       | TT          | CC         | CC        | AT         | AG         | AA        | AA         | CC         | AC         | TT         | GG         | TT         | CT         | AA         | TT         |
| Malvasia Preta      | TT          | CC         | CC        | AT         | AG         | AA        | AA         | CC         | AA         | CT         | GG         | TT         | CC         | AG         | AA         |
| Marufo              | CT          | CC         | CC        | TT         | AG         | AA        | AA         | CT         | AA         | CT         | GG         | CT         | CT         | GG         | AA         |
| Molar               | TT          | CT         | AA        | AT         | AG         | AA        | AA         | TT         | AA         | TT         | GG         | CT         | CC         | AA         | AT         |
| Montua              | TT          | CC         | CC        | TT         | GG         | AA        | AA         | CC         | AA         | TT         | AG         | TT         | CT         | AG         | AA         |
| Mouratón            | TT          | CC         | CC        | AT         | AG         | AA        | AA         | CC         | AC         | CT         | AG         | CT         | CT         | AG         | AA         |
| Mourisco de Semente | TT          | CC         | CC        | AT         | AG         | AA        | AA         | CC         | AC         | CT         | GG         | CC         | CC         | AG         | AT         |
| Nevoeira            | CC          | CC         | AA        | AT         | AG         | AT        | AC         | CT         | AC         | TT         | AA         | TT         | CC         | AA         | TT         |
| Palomino Fino       | CT          | CC         | CC        | TT         | AG         | AT        | AC         | CC         | AA         | CT         | AG         | CT         | CT         | AA         | TT         |
| Parraleta           | CT          | CC         | CC        | TT         | AG         | AT        | AA         | CC         | AC         | CT         | AG         | TT         | CT         | AA         | AT         |
| Perlette            | CC          | CC         | CC        | AA         | AG         | AA        | AA         | TT         | AA         | TT         | AG         | CT         | CC         | AA         | AT         |

**Table S4.** (cont.)

| Genotype         | SNP1513_153 | SNP191_100 | SNP197_82 | SNP259_199 | SNP269_308 | SNP325_65 | SNP425_205 | SNP447_244 | SNP555_132 | SNP579_187 | SNP581_114 | SNP593_149 | SNP613_315 | SNP697_296 | SNP819_210 |
|------------------|-------------|------------|-----------|------------|------------|-----------|------------|------------|------------|------------|------------|------------|------------|------------|------------|
| Roseira          | TT          | CC         | AC        | AT         | AG         | AA        | AA         | CC         | AA         | CT         | GG         | TT         | TT         | GG         | AA         |
| Rufete           | CT          | CC         | AA        | TT         | AA         | AA        | AA         | CT         | AA         | CT         | AG         | CT         | CT         | AG         | AA         |
| Samarrinho       | CT          | CC         | AC        | AT         | AG         | AA        | AA         | CT         | AA         | TT         | GG         | TT         | CC         | AA         | AT         |
| Síria            | TT          | CC         | AC        | AT         | AG         | AA        | AA         | CC         | AC         | CT         | AG         | TT         | CT         | AG         | AT         |
| Tamarez          | TT          | CC         | CC        | TT         | AG         | AA        | AA         | CC         | AA         | TT         | GG         | TT         | TT         | AG         | AT         |
| Tempranillo      | CC          | CC         | AA        | AA         | GG         | TT        | AA         | CC         | AC         | TT         | AG         | TT         | CC         | AA         | AA         |
| Tinta Aguiar     | CT          | CT         | CC        | TT         | GG         | AA        | AA         | CC         | AA         | CT         | GG         | CT         | CC         | AG         | AT         |
| Tinta Barroca    | CC          | CT         | AC        | TT         | AG         | AA        | AA         | CC         | AA         | TT         | GG         | CT         | CT         | AG         | AT         |
| Tinta Carvalha   | CT          | CT         | CC        | TT         | AG         | AA        | AA         | CT         | AC         | TT         | AG         | TT         | CT         | AG         | AT         |
| Tinta Francisca  | CC          | CC         | AA        | TT         | AA         | AA        | AC         | CC         | AC         | TT         | AA         | TT         | CC         | AA         | TT         |
| Tinta Mesquita   | CC          | CC         | CC        | TT         | AA         | AA        | AA         | TT         | AC         | TT         | GG         | CT         | CT         | AG         | AT         |
| Tinto Cão        | CC          | CC         | CC        | AT         | AG         | AA        | AA         | CC         | AA         | TT         | AG         | TT         | CT         | AG         | AT         |
| Touriga Fêmea    | CT          | CC         | CC        | TT         | GG         | AA        | AA         | CC         | AA         | TT         | GG         | TT         | CT         | AA         | TT         |
| Touriga Franca   | CC          | CC         | AC        | TT         | AG         | AA        | AA         | CT         | AA         | CT         | GG         | TT         | CC         | AG         | AT         |
| Touriga Nacional | CC          | CT         | AC        | TT         | AG         | AA        | AA         | CC         | AA         | TT         | GG         | TT         | CC         | AA         | TT         |
| Trincadeira      | TT          | CC         | AC        | AT         | AG         | AT        | AA         | CC         | AC         | CT         | AG         | TT         | TT         | AG         | TT         |
| Trousseau Noir   | CT          | CC         | AC        | TT         | AA         | AA        | AA         | CT         | AC         | TT         | GG         | TT         | CC         | AA         | AT         |
| Vinhão           | CT          | CC         | AC        | TT         | AG         | AA        | AA         | CT         | CC         | TT         | GG         | CT         | CC         | AA         | AT         |
| NG001            | CT          | CT         | AC        | AA         | GG         | AA        | AA         | CC         | AC         | TT         | AG         | TT         | CT         | AG         | AT         |
| NG002            | CC          | CT         | AC        | AA         | AG         | AA        | AA         | CT         | AA         | TT         | GG         | TT         | CC         | AG         | AT         |
| NG003            | CT          | CC         | AC        | TT         | AG         | AA        | AA         | CT         | AA         | TT         | GG         | CT         | CC         | AG         | AT         |
| NG004            | TT          | CC         | AC        | AT         | GG         | AA        | AA         | CT         | AA         | CC         | GG         | TT         | CT         | AG         | AA         |
| NG005            | CC          | CT         | AA        | TT         | AG         | AA        | AA         | CC         | AA         | TT         | AG         | TT         | CT         | AA         | AT         |
| NG006            | CC          | CC         | CC        | AT         | AA         | AA        | AA         | CT         | AA         | TT         | AG         | TT         | CC         | GG         | AT         |
| NG007            | TT          | CC         | CC        | AT         | AG         | AA        | AA         | CC         | AC         | CT         | GG         | CT         | CC         | AG         | AA         |
| NG008            | CC          | CC         | AC        | AT         | GG         | AA        | AA         | TT         | AC         | TT         | AG         | CC         | CC         | AG         | AT         |
| NG009            | CT          | CC         | CC        | TT         | GG         | AT        | AA         | CT         | AA         | CT         | AG         | CT         | TT         | GG         | AT         |
| NG010            | CT          | CC         | AC        | AT         | AG         | AA        | AA         | --         | AA         | CT         | GG         | TT         | --         | --         | --         |
| NG011            | CT          | CC         | CC        | TT         | GG         | AA        | AA         | CT         | AC         | CC         | AG         | CT         | CT         | GG         | AT         |
| NG012            | CC          | CC         | AC        | TT         | AA         | AA        | AA         | CT         | AC         | CT         | GG         | CT         | CT         | AG         | AA         |
| NG013            | CC          | CC         | AC        | TT         | AG         | AT        | AA         | CT         | AA         | CT         | GG         | TT         | CC         | AA         | AT         |

**Table S4.** (cont.)

| Genotype            | SNP829_281 | SNP873_244 | SNP879_308 | SNP895_382 | SNP945_88 | SNP947_288 | Vvi_10113 | Vvi_10353 | Vvi_10992 | Vvi_12882 | Vvi_1617 | Vvi_9227 | Vvi_9920 | SNP_NG_C_001 | SNP_NG_C_003 | SNP_NG_D_003 |
|---------------------|------------|------------|------------|------------|-----------|------------|-----------|-----------|-----------|-----------|----------|----------|----------|--------------|--------------|--------------|
| Afus Ali            | GG         | CC         | AG         | AA         | AG        | AG         | AA        | GG        | TT        | CT        | CC       | AA       | AA       | C            | C            | G            |
| Alfrocheiro         | GG         | CT         | AA         | AA         | AA        | AG         | AG        | GG        | AT        | CT        | CC       | TT       | GG       | C            | C            | G            |
| Alvarelhão Ceitão   | GG         | CT         | GG         | TT         | AG        | GG         | GG        | GG        | AA        | TT        | AA       | AT       | GG       | C            | C            | G            |
| Baga                | GG         | CC         | AA         | AT         | AG        | GG         | AA        | GG        | TT        | CT        | AA       | TT       | GG       | C            | C            | G            |
| Barca               | AG         | CT         | AA         | AT         | AG        | GG         | --        | GG        | AT        | CC        | AC       | TT       | GG       | C            | C            | A            |
| Black Monukka       | AG         | CT         | AG         | AT         | AG        | AA         | AA        | AA        | AT        | TT        | CC       | TT       | GG       | T            | T            | G            |
| Camarate Tinto      | GG         | CC         | AA         | AA         | AG        | AG         | AG        | GG        | AT        | TT        | AC       | TT       | GG       | C            | C            | G            |
| Carrega Branco      | AG         | CT         | AA         | AT         | AG        | GG         | AG        | AG        | AT        | TT        | AC       | AT       | GG       | C            | C            | A            |
| Carrega Tinto       | GG         | CT         | AA         | AA         | AA        | AG         | AG        | GG        | AT        | TT        | CC       | AT       | GG       | C            | C            | G            |
| Casculho            | GG         | CC         | AG         | AT         | AG        | AG         | GG        | GG        | AT        | CT        | AC       | AT       | GG       | C            | C            | G            |
| Castelão            | GG         | CC         | AG         | AA         | AG        | AA         | AA        | GG        | AT        | TT        | CC       | TT       | GG       | C            | C            | G            |
| Chasselas           | AA         | TT         | AA         | AT         | AG        | AG         | AA        | GG        | AA        | TT        | AA       | TT       | AG       | C            | C            | A            |
| Cidadelhe           | GG         | CC         | AA         | TT         | GG        | AG         | GG        | GG        | TT        | TT        | AC       | TT       | GG       | C            | C            | A            |
| Cornifesto          | GG         | CC         | AA         | AT         | AG        | AA         | AG        | GG        | AT        | TT        | CC       | AT       | GG       | C            | C            | G            |
| Dodrelyabi          | AA         | CT         | GG         | AT         | AG        | GG         | AA        | GG        | AA        | TT        | AC       | TT       | AG       | C            | T            | G            |
| Donzelinho Roxo     | GG         | TT         | AA         | AA         | AG        | AG         | GG        | GG        | AA        | CT        | AA       | TT       | GG       | C            | C            | A            |
| Folha de Figueira   | AA         | CC         | AG         | AT         | AG        | GG         | AG        | GG        | AA        | TT        | AC       | AA       | GG       | C            | C            | G            |
| Gouveio             | AG         | TT         | AA         | AT         | AG        | AA         | GG        | GG        | AA        | TT        | AC       | AT       | GG       | C            | C            | G            |
| Grand Noir          | AG         | TT         | AG         | AA         | AA        | GG         | AA        | GG        | AT        | CC        | AC       | TT       | AG       | C            | C            | G            |
| Grec Rouge          | AA         | TT         | AA         | AA         | AA        | GG         | AG        | GG        | AA        | TT        | AC       | AA       | GG       | C            | C            | G            |
| Hebén               | AG         | CT         | AG         | AT         | AG        | AG         | AG        | GG        | AT        | TT        | AC       | AT       | GG       | C            | C            | G            |
| Jeronimo            | GG         | CT         | AG         | AA         | AG        | AG         | AG        | GG        | AA        | TT        | AA       | AT       | GG       | C            | C            | G            |
| Malandra            | AG         | CT         | GG         | AT         | AG        | AA         | AG        | GG        | TT        | TT        | AC       | TT       | AG       | C            | C            | A            |
| Malvasia Fina       | GG         | CT         | AG         | AT         | AG        | GG         | AA        | GG        | TT        | CT        | AC       | TT       | GG       | C            | C            | G            |
| Malvasia Preta      | GG         | CT         | AA         | AT         | AG        | AG         | AG        | GG        | AT        | TT        | AC       | TT       | GG       | C            | C            | G            |
| Marufo              | GG         | CT         | AA         | AT         | GG        | GG         | AG        | GG        | AT        | CT        | AC       | TT       | AG       | C            | C            | A            |
| Molar               | GG         | CT         | AG         | AA         | AA        | AG         | AA        | GG        | AA        | CT        | CC       | TT       | GG       | C            | C            | G            |
| Montua              | AG         | CT         | AA         | AT         | AA        | AA         | AA        | GG        | AT        | TT        | AC       | AT       | AG       | C            | C            | G            |
| Mouratón            | GG         | CC         | AA         | AT         | AG        | GG         | GG        | GG        | TT        | CT        | AC       | AT       | GG       | C            | C            | G            |
| Mourisco de Semente | AG         | CT         | AG         | TT         | AG        | GG         | AG        | AG        | AA        | TT        | AA       | TT       | GG       | C            | C            | A            |
| Nevoeira            | AA         | CC         | GG         | TT         | AG        | AG         | GG        | AG        | AA        | TT        | AC       | AT       | GG       | C            | C            | G            |
| Palomino Fino       | AG         | TT         | GG         | AT         | AG        | AG         | AG        | GG        | AT        | TT        | AC       | AT       | GG       | C            | C            | A            |
| Parraleta           | AG         | CC         | AG         | AT         | AG        | AG         | AA        | GG        | AT        | CT        | AC       | AT       | GG       | C            | C            | G            |
| Perlette            | GG         | CC         | AA         | AT         | AA        | GG         | AA        | GG        | TT        | TT        | AC       | TT       | GG       | C            | C            | G            |

**Table S4.** (cont.)

| Genotype         | SNP829_281 | SNP873_244 | SNP879_308 | SNP895_382 | SNP945_88 | SNP947_288 | Vvi_10113 | Vvi_10353 | Vvi_10992 | Vvi_12882 | Vvi_1617 | Vvi_9227 | Vvi_9920 | SNP_NG_C_001 | SNP_NG_C_003 | SNP_NG_D_003 |
|------------------|------------|------------|------------|------------|-----------|------------|-----------|-----------|-----------|-----------|----------|----------|----------|--------------|--------------|--------------|
| Roseira          | GG         | CC         | AA         | AA         | AG        | AG         | GG        | GG        | AT        | CT        | AC       | TT       | AG       | C            | C            | A            |
| Rufete           | GG         | CT         | AG         | AT         | AA        | AG         | AG        | AG        | AT        | CT        | CC       | AT       | GG       | C            | C            | G            |
| Samarrinho       | AG         | CT         | AG         | TT         | AA        | AG         | AA        | GG        | AT        | CT        | CC       | TT       | GG       | C            | C            | A            |
| Síria            | AG         | CC         | AG         | TT         | AG        | GG         | AA        | GG        | AT        | TT        | CC       | AT       | GG       | C            | C            | G            |
| Tamarez          | GG         | CT         | AG         | TT         | GG        | AG         | AA        | AG        | AT        | TT        | AC       | AT       | GG       | C            | C            | A            |
| Tempranillo      | AA         | TT         | AA         | AA         | AG        | AG         | AA        | GG        | TT        | TT        | AC       | TT       | AA       | C            | C            | G            |
| Tinta Aguiar     | AG         | --         | AA         | AT         | AG        | GG         | AG        | GG        | AT        | CC        | AC       | TT       | AG       | C            | C            | A            |
| Tinta Barroca    | AG         | CC         | AA         | AA         | AG        | AG         | AA        | GG        | AT        | CT        | AC       | TT       | GG       | C            | C            | A            |
| Tinta Carvalha   | GG         | CC         | AG         | AT         | GG        | GG         | GG        | GG        | AT        | TT        | AC       | AT       | GG       | C            | C            | A            |
| Tinta Francisca  | AG         | CT         | AA         | AT         | AG        | AA         | AG        | AG        | AT        | TT        | AC       | AT       | AG       | C            | C            | G            |
| Tinta Mesquita   | AG         | CT         | AG         | AT         | AG        | GG         | GG        | GG        | AT        | TT        | AC       | TT       | GG       | C            | C            | A            |
| Tinto Cão        | AG         | CC         | AG         | TT         | AG        | --         | AA        | AG        | AT        | TT        | CC       | AT       | GG       | C            | C            | G            |
| Touriga Fêmea    | AG         | --         | AG         | AT         | AA        | AG         | AA        | GG        | AT        | CC        | AA       | TT       | GG       | C            | C            | G            |
| Touriga Franca   | AG         | CT         | AA         | TT         | AG        | AG         | AA        | GG        | AA        | CT        | AA       | TT       | AG       | C            | C            | A            |
| Touriga Nacional | AA         | --         | AA         | AT         | AA        | --         | AA        | GG        | AT        | CT        | AC       | TT       | GG       | C            | C            | G            |
| Trincadeira      | AA         | CC         | AG         | AT         | AA        | GG         | AA        | GG        | TT        | TT        | AC       | AT       | GG       | C            | C            | A            |
| Trousseau Noir   | GG         | CC         | AG         | AT         | AG        | GG         | AA        | AG        | AA        | CC        | AC       | AT       | GG       | C            | C            | G            |
| Vinhão           | AA         | CT         | AG         | TT         | AA        | GG         | AG        | AG        | AA        | TT        | CC       | TT       | AG       | C            | C            | G            |
| NG001            | GG         | CT         | AG         | AT         | AG        | GG         | AG        | GG        | TT        | CT        | AC       | TT       | GG       | C            | C            | A            |
| NG002            | AG         | CT         | AA         | TT         | AG        | AG         | AG        | GG        | AT        | TT        | CC       | TT       | GG       | C            | C            | A            |
| NG003            | GG         | CT         | AG         | AT         | GG        | GG         | AG        | AG        | AT        | CT        | AC       | TT       | AG       | C            | C            | A            |
| NG004            | GG         | TT         | AA         | AT         | AG        | AG         | AG        | GG        | AT        | TT        | AC       | TT       | AG       | C            | C            | A            |
| NG005            | GG         | CT         | AG         | AA         | AG        | GG         | GG        | GG        | AT        | CT        | CC       | AA       | AG       | C            | C            | A            |
| NG006            | AG         | CT         | AG         | AT         | GG        | GG         | AG        | AG        | AT        | CT        | CC       | AT       | AG       | C            | C            | A            |
| NG007            | GG         | CC         | AA         | AT         | GG        | GG         | GG        | GG        | AT        | TT        | AC       | TT       | AG       | C            | C            | A            |
| NG008            | AG         | CT         | AA         | AA         | GG        | GG         | AA        | GG        | AT        | CT        | AC       | AT       | GG       | C            | C            | A            |
| NG009            | AG         | CC         | AG         | TT         | AG        | GG         | AG        | GG        | AT        | CT        | AC       | AT       | AG       | C            | C            | A            |
| NG010            | --         | --         | AA         | AT         | AG        | AG         | AG        | GG        | AT        | CT        | AC       | TT       | AG       | C            | C            | A            |
| NG011            | AG         | CC         | AA         | TT         | AG        | GG         | AG        | GG        | TT        | CT        | AA       | AT       | GG       | C            | C            | A            |
| NG012            | AG         | CT         | AG         | AT         | AG        | GG         | GG        | AG        | AA        | CT        | CC       | TT       | AA       | C            | C            | A            |
| NG013            | AA         | CT         | AG         | AA         | AA        | GG         | AA        | AG        | TT        | CT        | CC       | AT       | GG       | C            | C            | G            |

**Table S5.** Genetic parameters, and allele sizes and frequencies over 6 microsatellite loci in the 65 non-redundant genotypes analysed in this study.

| SSR markers | VVS2       |              | VVMD5 |       | VVMD7      |              | VVMD27 |       | VrZAG62    |              | VrZAG79    |              |
|-------------|------------|--------------|-------|-------|------------|--------------|--------|-------|------------|--------------|------------|--------------|
| <b>Na</b>   | 12         |              | 9     |       | 10         |              | 7      |       | 9          |              | 10         |              |
| <b>Ne</b>   | 5.545      |              | 6.995 |       | 3.928      |              | 5.027  |       | 4.120      |              | 4.154      |              |
| <b>Ho</b>   | 0.892      |              | 0.954 |       | 0.785      |              | 0.877  |       | 0.785      |              | 0.862      |              |
| <b>He</b>   | 0.820      |              | 0.857 |       | 0.745      |              | 0.801  |       | 0.757      |              | 0.759      |              |
| <b>PIC</b>  | 0.793      |              | 0.844 |       | 0.736      |              | 0.777  |       | 0.738      |              | 0.749      |              |
| Allele no.  | AS         | AF           | AS    | AF    | AS         | AF           | AS     | AF    | AS         | AF           | AS         | AF           |
| 1           | 132        | 0.185        | 218   | 0.023 | <u>237</u> | <b>0.008</b> | 171    | 0.015 | 189        | 0.123        | <u>237</u> | <b>0.008</b> |
| 2           | 134        | 0.038        | 222   | 0.169 | 239        | 0.438        | 175    | 0.115 | 191        | 0.431        | 241        | 0.031        |
| 3           | 136        | 0.046        | 224   | 0.108 | 241        | 0.015        | 177    | 0.262 | 195        | 0.077        | 243        | 0.115        |
| 4           | <u>138</u> | <b>0.008</b> | 226   | 0.015 | 243        | 0.177        | 179    | 0.062 | 197        | 0.138        | 245        | 0.300        |
| 5           | 140        | 0.015        | 228   | 0.115 | 247        | 0.031        | 181    | 0.123 | 199        | 0.031        | <u>247</u> | <b>0.008</b> |
| 6           | 142        | 0.262        | 230   | 0.138 | 249        | 0.077        | 185    | 0.277 | 201        | 0.015        | 249        | 0.331        |
| 7           | 144        | 0.162        | 232   | 0.177 | 253        | 0.123        | 191    | 0.146 | 203        | 0.085        | <u>253</u> | <b>0.008</b> |
| 8           | 150        | 0.215        | 234   | 0.169 | <u>255</u> | <b>0.008</b> |        |       | <u>205</u> | <b>0.008</b> | 255        | 0.162        |
| 9           | 152        | 0.015        | 236   | 0.085 | 257        | 0.085        |        |       | 207        | 0.092        | 257        | 0.015        |
| 10          | <u>154</u> | <b>0.008</b> |       |       | 263        | 0.038        |        |       |            |              | 259        | 0.023        |
| 11          | 156        | 0.031        |       |       |            |              |        |       |            |              |            |              |
| 12          | 158        | 0.015        |       |       |            |              |        |       |            |              |            |              |

*Na* - Average number of different alleles per locus; *Ne* - number of effective alleles; *Ho* - observed heterozygosity; *He* - expected heterozygosity; *PIC* - polymorphism information content.

AS - Allele sizes, in base pairs; AF - allele frequencies (AF).

Unique alleles show an AF = 0.08 and they are bold underlined (see **Supplementary table S3**).



**Table S6.** Structure results at K = 2 based on 226 SNP markers. Genotypes with membership coefficients ( $q$  - values) below the threshold of 0.7 for genetic group assignment were admixed.

| Prime name          | $q$ -value  |             | Estimated genetic group |
|---------------------|-------------|-------------|-------------------------|
|                     | SNP-group 1 | SNP-group 2 |                         |
| Afus Ali            | 0.455       | 0.545       | Admixed                 |
| Alfrocheiro         | 0.982       | 0.018       | 1                       |
| Alvarelhão Ceitão   | 0.648       | 0.352       | Admixed                 |
| Baga                | 0.767       | 0.233       | 1                       |
| Barca               | 0.019       | 0.981       | 2                       |
| Black Monukka       | 0.582       | 0.418       | Admixed                 |
| Camarate Tinto      | 0.997       | 0.003       | 1                       |
| Carrega Branco      | 0.702       | 0.298       | 1                       |
| Carrega Tinto       | 0.994       | 0.006       | 1                       |
| Casculho            | 0.980       | 0.020       | 1                       |
| Castelão            | 0.996       | 0.004       | 1                       |
| Chasselas           | 0.243       | 0.757       | 2                       |
| Cidadelhe           | 0.510       | 0.490       | Admixed                 |
| Cornifesto          | 0.995       | 0.005       | 1                       |
| Dodrelyabi          | 0.523       | 0.477       | Admixed                 |
| Donzelinho Roxo     | 0.301       | 0.699       | 2                       |
| Folha de Figueira   | 0.403       | 0.597       | Admixed                 |
| Gouveio             | 0.529       | 0.471       | Admixed                 |
| Grand Noir          | 0.514       | 0.486       | Admixed                 |
| Grec Rouge          | 0.405       | 0.595       | Admixed                 |
| Hebén               | 0.726       | 0.274       | 1                       |
| Jerónimo            | 0.532       | 0.468       | Admixed                 |
| Malandra            | 0.632       | 0.368       | Admixed                 |
| Malvasia Fina       | 0.994       | 0.006       | 1                       |
| Malvasia Preta      | 0.997       | 0.003       | 1                       |
| Marufo              | 0.018       | 0.982       | 2                       |
| Molar               | 0.735       | 0.265       | 1                       |
| Montua              | 0.636       | 0.364       | Admixed                 |
| Mouratón            | 0.996       | 0.004       | 1                       |
| Mourisco de Semente | 0.258       | 0.742       | 2                       |
| Nevoeira            | 0.556       | 0.444       | Admixed                 |
| Palomino Fino       | 0.532       | 0.468       | Admixed                 |

**Table S6.** (cont.)

| Prime name       | q-value     |             | Estimated genetic group |
|------------------|-------------|-------------|-------------------------|
|                  | SNP-group 1 | SNP-group 2 |                         |
| Parraleta        | 0.606       | 0.394       | Admixed                 |
| Perlette         | 0.582       | 0.418       | Admixed                 |
| Roseira          | 0.535       | 0.465       | Admixed                 |
| Rufete           | 0.768       | 0.232       | 1                       |
| Samarrinho       | 0.632       | 0.368       | Admixed                 |
| Síria            | 0.835       | 0.165       | 1                       |
| Tamarez          | 0.840       | 0.160       | 1                       |
| Tempranillo      | 0.510       | 0.490       | Admixed                 |
| Tinta Aguiar     | 0.007       | 0.993       | 2                       |
| Tinta Barroca    | 0.025       | 0.975       | 2                       |
| Tinta Carvalha   | 0.689       | 0.311       | Admixed                 |
| Tinta Francisca  | 0.548       | 0.452       | Admixed                 |
| Tinta Mesquita   | 0.135       | 0.865       | 2                       |
| Tinto Cão        | 0.379       | 0.621       | Admixed                 |
| Touriga Fêmea    | 0.503       | 0.497       | Admixed                 |
| Touriga Franca   | 0.005       | 0.995       | 2                       |
| Touriga Nacional | 0.204       | 0.796       | 2                       |
| Trincadeira      | 0.962       | 0.038       | 1                       |
| Trousseau Noir   | 0.633       | 0.367       | Admixed                 |
| Vinhão           | 0.336       | 0.664       | Admixed                 |
| NG001            | 0.957       | 0.043       | 1                       |
| NG002            | 0.636       | 0.364       | Admixed                 |
| NG003            | 0.388       | 0.612       | Admixed                 |
| NG004            | 0.205       | 0.795       | 2                       |
| NG005            | 0.595       | 0.405       | Admixed                 |
| NG006            | 0.347       | 0.653       | Admixed                 |
| NG007            | 0.709       | 0.291       | 1                       |
| NG008            | 0.015       | 0.985       | 2                       |
| NG009            | 0.318       | 0.682       | Admixed                 |
| NG010            | 0.158       | 0.842       | 2                       |
| NG011            | 0.292       | 0.708       | 2                       |
| NG012            | 0.268       | 0.732       | 2                       |
| NG013            | 0.634       | 0.366       | Admixed                 |

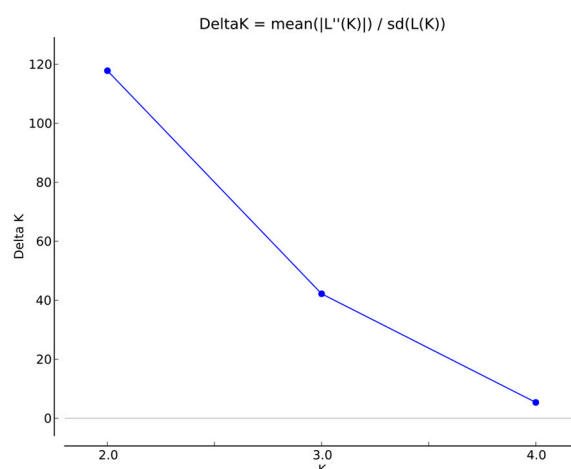

**Figure S1.** Delta K plots obtained from STRUCTURE HARVESTER to set the most likely number of genetic groups within the 65 non-redundant grape population identified in the present study, based on 226 SNP data.

## References

1. Maul, E.; Töpfer, R.; Röckel, F.; Brühl, U.; Hundemer, M.; Mahler-Ries, A.; Walk, M.; Kecke, S.; Wolck, A.; Ganesch, A. Vitis International Variety Catalogue. 2021. Available online: [www.vivc.de](http://www.vivc.de) (accessed on 2 July 2021).
2. Cunha, J.; Teixeira-Santos, M.; Carneiro, I.C.; Fevereço, P.; Eiras-Dias, J.E. Portuguese traditional grapevine cultivars and wild vines (*Vitis vinifera* L.) share morphological and genetic traits. *Genet. Res. Crop Evol.* **2009**, *56*, 975–989, <https://doi.org/10.1007/s10722-009-9416-4>.
3. Imazio, S.; Labra, M.; Grassi, F.; Scienza, A.; Failla, O. Chloroplast microsatellites to investigate the origin of grapevine. *Genet. Resour. Crop. Evol.* **2006**, *10*, 1–9, <https://doi.org/10.1007/s10722-004-6896-0>.
4. Castro, I.; Pinto-Carnide, O.; Ortiz, J.M.; Martín, J.P. Chloroplast genome diversity in Portuguese grapevine (*Vitis vinifera* L.) cultivars. *Mol. Biotechnol.* **2013**, *54*, 528–540, <https://doi.org/10.1007/s12033-012-9593-9>.
5. Augusto, D.; Oliveira, A.A.; Falco, V.; Castro, I. Uncovering Northeast Portugal grapevine's varietal legacy. *Vitis* **2019**, *58*, 89–93, <https://doi.org/10.5073/vitis.2019.58.special-issue.89-93>.
6. Baleiras-Couto, M.M.; Eiras-Dias, J.E. Detection and identification of grape varieties in must and wine using nuclear and chloroplast microsatellite markers. *Anal. Chim. Acta* **2006**, *563*, 283–291, <https://doi.org/10.1016/j.aca.2005.09.076>.
7. Moita Maçanita, A.; Santos, R.; Gomes, A.C.; Santos, A. Unravelling the origin of *Vitis vinifera* L. Verdelho. *Aust. J. Grape Wine Res.* **2018**, *24*, 450–460, <https://doi.org/10.1111/ajgw.12353>.
8. Arroyo-García, R.; LeFort, F.; de Andrés, M.T.; Ibáñez, J.; Borrego, J.; Jouve, N.; Cabello, F.; Martínez-Zapater, J.M. Chloroplast microsatellite polymorphisms in *Vitis* species. *Genome* **2002**, *45*, 1142–1149, <https://doi.org/10.1139/g02-087>.
